# Supplementary material for: A high-performance self-powered photodetector based on SnP2S6 in the visible light region
Source: Royal Society of Chemistry journal article supplement (doi:10.1039/d3tc03312k), 2023-01-01
Supplement: d3tc03312k1.pdf [file d3tc03312k1.pdf]

## Supporting Information

High-performance self-powered photodetector based on SnP<sub>2</sub>S<sub>6</sub> in visible light  
Shuxian Wang<sup>1</sup>, Jiaming Song<sup>1,3,4,\*</sup>, Linghao Zong<sup>1</sup>, Juanjuan Yang<sup>1</sup>, Bingda Li<sup>1</sup>, Feng  
Teng<sup>1</sup>, Peng Hu<sup>1</sup>, Haibo Fan<sup>1</sup>, Xin Zhao<sup>2</sup>

1. School of Physics, Northwest University, Xi'an 710127, China
2. School of Optoelectronic Engineering, Xi'an Technological University, Xi'an 710021, China
3. Carbon Neutrality College (Yulin), Northwest University, China
4. Shaanxi Key Laboratory for Carbon Neutral Technology, China

\*: Corresponding author: jiaming.song@nwu.edu.cn

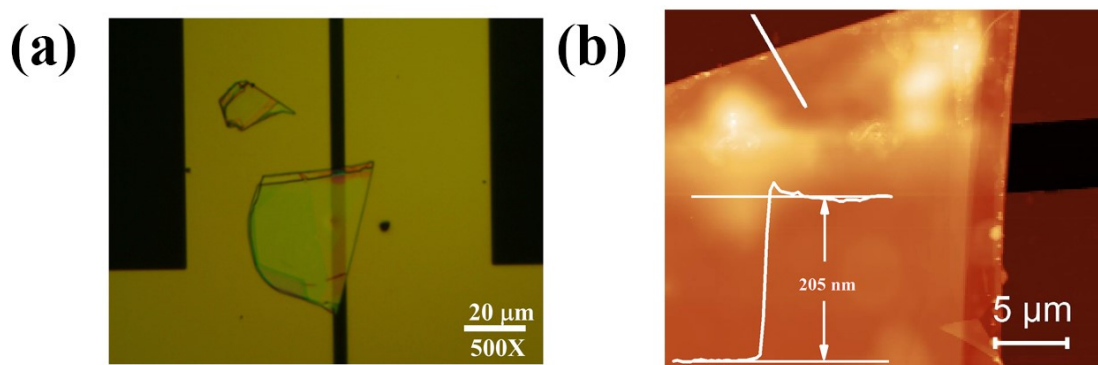

Figure S1 (a) Optical microscope image of the device. (b) AFM thickness characterization of the SnP<sub>2</sub>S<sub>6</sub> flake on electrodes.

Table S1. Photodetector Performance based on different van der Waals materials

| Material                        | Thickness [nm] | Wavelength [nm] | Response time [ms] | Responsivity [mA/W] | Detectivity [Jones]   | Reference |
|---------------------------------|----------------|-----------------|--------------------|---------------------|-----------------------|-----------|
| MoS <sub>2</sub>                | 2.6            | white-light     | 500                | 1.5×10 <sup>5</sup> | 10 <sup>12</sup>      | 1         |
| MoSe <sub>2</sub>               | 0.71           | 532             | 60                 | 13                  | -                     | 2         |
| NiPS <sub>3</sub>               | 3.5            | 254             | 3.2                | 126                 | 1.22×10 <sup>12</sup> | 3         |
| MnPS <sub>3</sub>               | 40             | 365             | 340                | 2880                | -                     | 4         |
| MnPSe <sub>3</sub>              | 50.1           | 365             | 1220               | 426                 | 3.1×10 <sup>9</sup>   | 5         |
| FePS <sub>3</sub>               | 11             | 254             | 105                | 171.6               | -                     | 6         |
| SnP <sub>2</sub> S <sub>6</sub> | 70.6           | 425             | 20                 | 146.82              | 8.0×10 <sup>10</sup>  | This work |

Table S2. Performance of self-powered photodetectors based on different materials

| Material                                              | Bias [V] | Wavelength [nm] | Response time [ms] | Responsivity [mA/W]   | Detectivity [Jones]   | Reference |
|-------------------------------------------------------|----------|-----------------|--------------------|-----------------------|-----------------------|-----------|
| ZnS                                                   | 0        | 297             | 90/70              | 2560                  | $1.67 \times 10^{10}$ | 7         |
| $\alpha$ -Ga <sub>2</sub> O <sub>3</sub>              | 0        | 254             | 451                | 0.149                 | $3.1 \times 10^9$     | 8         |
| $\beta$ -Ga <sub>2</sub> O <sub>3</sub>               | 0        | 254             | 80/30              | 1.28                  | $1.77 \times 10^{11}$ | 9         |
| InGaZnO                                               | 0        | 350             | 100                | 5                     | -                     | 10        |
| SnS                                                   | 0        | 390             | 80                 | 2.04                  | $0.85 \times 10^9$    | 11        |
| AgIn <sub>5</sub> Se <sub>8</sub> /FePSe <sub>3</sub> | 0        | 880             | 20                 | $3.8 \times 10^{-3}$  | $5.77 \times 10^8$    | 12        |
| CuO/ZnO                                               | 0        | 405             | 20                 | $1.24 \times 10^{-3}$ | $9.77 \times 10^6$    | 13        |
| Ag NPs-Mg <sub>2</sub> Si/Si                          | 0        | 808             | 1.74/0.65          | 2550                  | $1.51 \times 10^{12}$ | 14        |
| SnP <sub>2</sub> S <sub>6</sub>                       | 0        | 515             | 40                 | 8.81                  | $5.66 \times 10^9$    | This work |

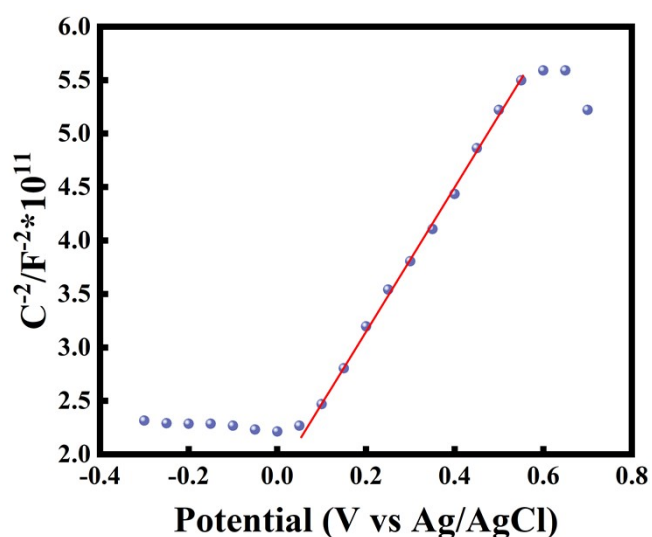

Figure S2 Mott-Schottky plot of SnP<sub>2</sub>S<sub>6</sub>.

The positive slope of the measured curve shows that SnP<sub>2</sub>S<sub>6</sub> is an n-type semiconductor.

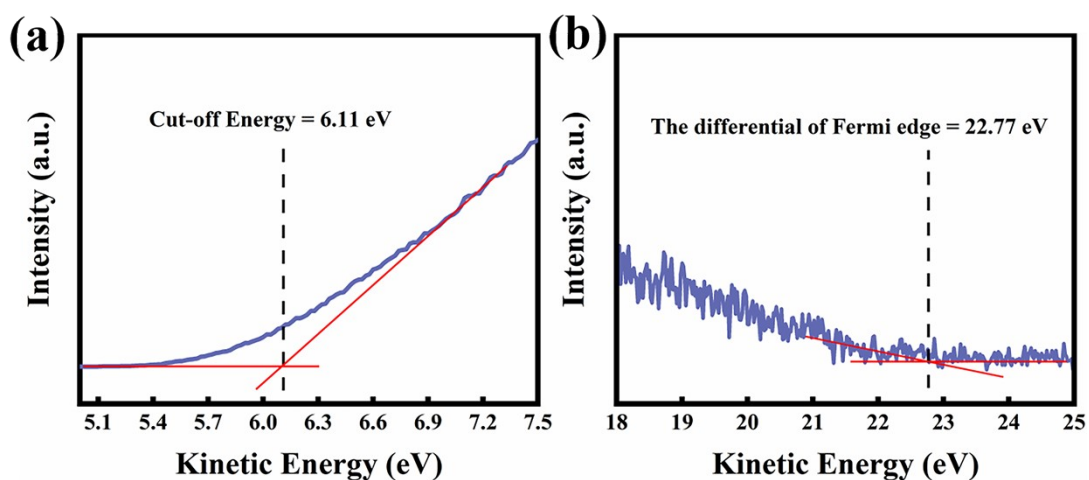

Figure S3 Ultraviolet photoelectron spectroscopy measurement of SnP<sub>2</sub>S<sub>6</sub>.

According to the following equations:

$$\Phi = h\nu + E_{\text{cutoff}} - E_{\text{Fermi}} \quad (\text{S1})$$

in which  $\Phi$ ,  $h\nu$ ,  $E_{\text{Fermi}}$  and  $E_{\text{cutoff}}$  are the work function, the incident photon energy, the differential of Fermi edge and the intersection of the straight line fitted by the cut-off edge and the baseline, respectively.

We substituted the cutting-off energy  $E_{\text{cutoff}} = 6.11$  eV,  $E_{\text{Fermi}} = 22.77$  eV and  $h\nu = 21.22$  eV into formula S1, thus the work function of  $\text{SnP}_2\text{S}_6$  could be achieved as  $-4.56$  eV.

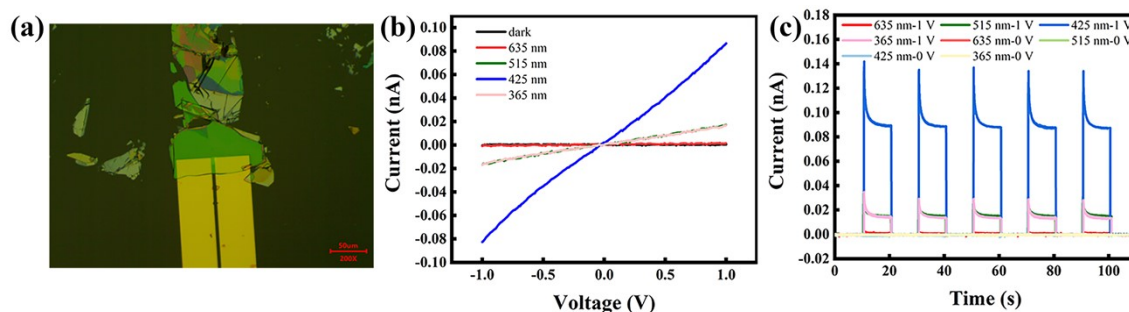

Figure S4 Photoelectric Response of symmetric electrode contact Device. (a) Optical image, (b) I-V and (c) I-t.

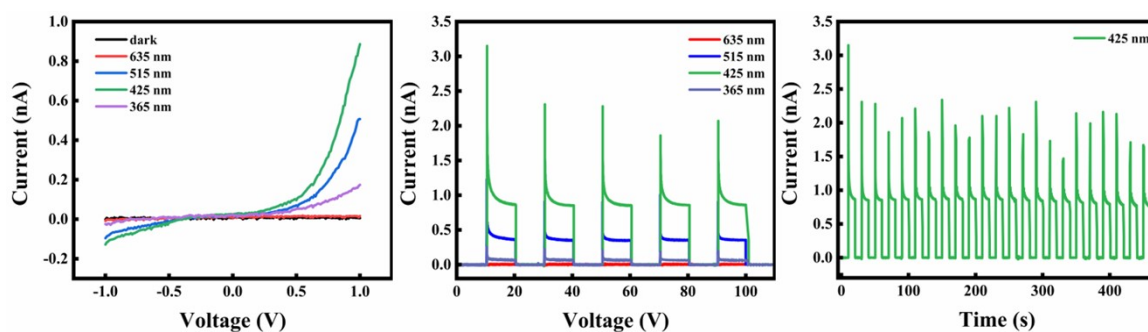

Figure S5 Stability test of the device after being placed in the glove box for 11 months. I-V curves (a) and I-t curves at 1 V (b) for different wavelengths. (c) Cycle stability measurement of the I-t curve at 1 V for 425 nm wavelength.

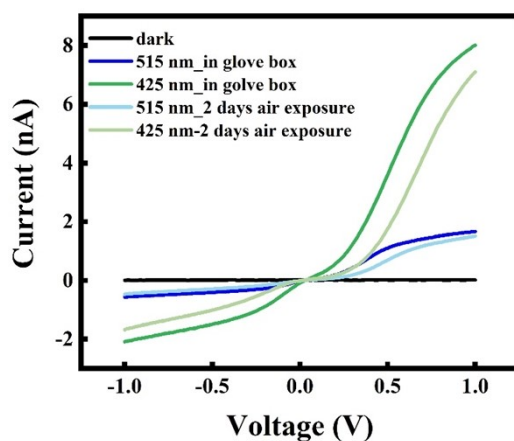

Figure S6 Air stability test of the device after 11 months in the glove box.

We have tested the device performance after exposure in air for two days. The atmospheric environment could lead to obvious decay of the device performance (the photocurrent decreased by 11.4 %) as shown in Figure S6.

## References

- 1 D. S. Schneider, A. Grundmann, A. Bablich, V. Passi, S. Kataria, H. Kalisch, M. Heuken, A. Vescan, D. Neumaier and M. C. Lemme, *ACS Photonics*, 2020, **7**, 1388–1395.
- 2 J. Xia, X. Huang, L.-Z. Liu, M. Wang, L. Wang, B. Huang, D.-D. Zhu, J.-J. Li, C.-Z. Gu and X.-M. Meng, *Nanoscale*, 2014, **6**, 8949–8955.
- 3 J. Chu, F. Wang, L. Yin, L. Lei, C. Yan, F. Wang, Y. Wen, Z. Wang, C. Jiang, L. Feng, J. Xiong, Y. Li and J. He, *Adv. Funct. Mater.*, 2017, **27**, 1701342.
- 4 R. Kumar, R. N. Jenjeti, M. P. Austeria and S. Sampath, *J. Mater. Chem. C*, 2019, **7**, 324–329.
- 5 P. Liu and Y. Pu, *Results Phys.*, 2021, **29**, 104750.
- 6 Y. Gao, S. Lei, T. Kang, L. Fei, C.-L. Mak, J. Yuan, M. Zhang, S. Li, Q. Bao, Z. Zeng, Z. Wang, H. Gu and K. Zhang, *Nanotechnology*, 2018, **29**, 244001.
- 7 Q. An, X. Meng, K. Xiong and Y. Qiu, *Sci. Rep.*, 2017, **7**, 4885.
- 8 K. Gu, Z. Zhang, H. Huang, K. Tang, J. Huang, M. Liao and L. Wang, *J. Mater. Chem. C*, 2023, **11**, 5371–5377.
- 9 L. Dong, J. Yu, R. Jia, J. Hu, Y. Zhang and J. Sun, *Opt. Mater. Express*, 2019, **9**, 1191.
- 10 C.-Y. Huang, T.-Y. Peng and W.-T. Hsieh, *ACS Appl. Electron. Mater.*, 2020, **2**, 2976–2983.
- 11 K. H. Modi, P. M. Pataniya, V. Patel and C. K. Sumesh, *Opt. Mater.*, 2022, **129**, 112504.
- 12 Q. Lu, L. Xu, Y. Ren, J. Gao, Y. Chen, J. Song, H. Fan, F. Teng, X. He and P. Hu, *ACS Appl. Electron. Mater.*, 2022, **4**, 5284–5291.
- 13 Z. Yin, Y. Zeng, D. Yang, Y. Jiao, J. Song, P. Hu, H. Fan and F. Teng, *J. Lumin.*, 2023, **257**, 119762.
- 14 Q. Zhu, P. Ye, Y. Tang, X. Zhu, Z. Cheng, J. Xu and M. Xu, *Nanotechnology*, 2021, **33**, 115202.
